# Supplementary material for: Household Cooking with Solid Fuels Contributes to Ambient PM2.5 Air Pollution and the Burden of Disease
Source: PubMed Central journal article supplement (PMC4256045; doi:10.1289/ehp.1206340), 2014-09-05
Supplement: ehp.1206340.s001.508.pdf [file ehp.1206340.s001.508.pdf]

**Supplemental Material**

**Household Cooking with Solid Fuels Contributes to Ambient PM<sub>2.5</sub>  
Air Pollution and the Burden of Disease**

Zoë A. Chafe, Michael Brauer, Zbigniew Klimont, Rita Van Dingenen, Sumi Mehta, Shilpa Rao,  
Keywan Riahi, Frank Dentener, and Kirk R. Smith

## Model Methodologies

The GAINS data used in Equation 1 represent the  $PPM_{2.5}$  attributable to cooking at the household level. They do not include, in either the numerator or denominator, secondary particle formation. The TM5-FASST data, used in Equation 2, include  $PPM_{2.5}$  and associated secondary particles; they represent do not include dust or sea salt. To estimate the dust/salt increment, country- or regional-level estimates of combustion-derived  $PM_{2.5}$  obtained from TM5-FASST were compared with country-level estimates of total  $APM_{2.5}$  (including dust and sea salt) developed in Brauer et al. (Brauer et al. 2012) for the Global Burden of Disease project, using inputs from TM5-FASST as well as ground and satellite observations. Current air quality legislations are included for both 2005 and 2010  $PM_{2.5}$  estimates. While ambient air quality legislations do not necessarily have a large impact on cooking-related emissions, the total  $APM_{2.5}$  in 2010 would have been higher if no legislation was assumed in the 2000-2010 period.

MESSAGE provides global, regional, and spatially explicit emissions of ( $CH_4$ ), sulfur dioxide ( $SO_2$ ), nitrogen oxides ( $NO_x$ ), carbon monoxide (CO), volatile organic compounds (VOCs), black carbon (BC), organic carbon (OC), and  $PM_{2.5}$  (at a  $1^\circ \times 1^\circ$  resolution). The downscaling methods for the socio-economic and demographic drivers as well as emissions are described in Grubler et al. (2007) and Riahi et al. (2011).

MESSAGE covers all greenhouse gas (GHG)-emitting sectors, including power plants, industry (combustion and process), road transport, households, international shipping and aviation, agricultural waste burning, and biomass burning (deforestation, savannah burning, and vegetation fires) for a full basket of greenhouse gases and other radiatively active gases.

To estimate the impacts of these spatially explicit emissions, atmospheric concentrations of average ambient population-exposure weighted anthropogenic  $PM_{2.5}$  and also specifically the household-related fraction are further derived using the TM5 –FASST source-receptor model. Modeled  $PM_{2.5}$  includes contributions from (i) primary  $PM_{2.5}$  released from anthropogenic sources and forest fires, and (ii) secondary inorganic aerosols formed from anthropogenic emissions of  $SO_2$ ,  $NO_x$  and  $NH_3$  (including water vapor). The data are reported on a spatial level and are then aggregated by country and GBD region. (See Supplemental Material, Table 1.)

Population-weighted annual average ambient  $PM_{2.5}$  concentration estimates ( $APM_{2.5}$ ) were produced by overlaying  $APM_{2.5}$  concentrations (from TM5-FASST,  $1^\circ \times 1^\circ$  resolution) with high-resolution population maps ( $0.042^\circ \times 0.042^\circ$ ). This allowed us to adjust the primary components of  $PM_{2.5}$  concentration gradients within the  $1^\circ \times 1^\circ$  gridcell using the underlying population gradients as a proxy. This method parametrizes the so-called urban increment and allows for a population-weighted  $APM_{2.5}$  concentration which is higher than or equal to the  $1^\circ \times 1^\circ$  area-averaged  $PM_{2.5}$  concentration (Brauer et al. 2012; Rao et al. 2012).

## References

- Brauer M, Amann M, Burnett RT, Cohen A, Dentener F, Ezzati M, et al. 2012. Exposure assessment for estimation of the global burden of disease attributable to outdoor air pollution. *Environ Sci Technol* 46:652-660.
- Grubler A, O'Neill B, Riahi K, Chirkov V, Goujon A, Kolp P, et al. 2007. Regional, national, and spatially explicit scenarios of demographic and economic change based on SRES. *Technological Forecasting and Social Change* 74:980-1029.
- Rao S, Chirkov V, Dentener F, Dingenen R, Pachauri S, Purohit P, et al. 2012. Environmental modeling and methods for estimation of the global health impacts of air pollution. *Environ Model Assess*:1-10.
- Riahi K, Rao S, Krey V, Cho C, Chirkov V, Fischer G, et al. 2011. RCP 8.5 - a scenario of comparatively high greenhouse gas emissions. *Climatic Change* 109:33-57.

**Table S1.** Regional Groupings Used in Global Burden of Disease 2010 (With Regional Population in 2010 of Countries Included in this Analysis and Total Population in Region). Note: countries that were not included in this analysis, because of data gaps, are shown in italics.

| <b>Region (population in millions)</b> | <b>Countries in region</b>                                                                                                                                                                                                                                                                                                                       |
|----------------------------------------|--------------------------------------------------------------------------------------------------------------------------------------------------------------------------------------------------------------------------------------------------------------------------------------------------------------------------------------------------|
| Asia Central (81/81)                   | Armenia, Azerbaijan, Georgia, Kazakhstan, Kyrgyzstan, Mongolia, Tajikistan, Turkmenistan, Uzbekistan                                                                                                                                                                                                                                             |
| Asia East (1,383/1,383)                | China, Democratic People's Republic of Korea, <i>Hong Kong</i>                                                                                                                                                                                                                                                                                   |
| Asia Pacific High Income (181/181)     | Brunei Darussalam, Japan, Republic of Korea, Singapore                                                                                                                                                                                                                                                                                           |
| Asia South (1,591/1,591)               | Afghanistan, Bangladesh, Bhutan, India, Nepal, Pakistan                                                                                                                                                                                                                                                                                          |
| Asia Southeast (609/610)               | Indonesia, Cambodia, Lao People's Democratic Republic, Sri Lanka, <i>Maldives</i> , Myanmar, Malaysia, Philippines, Thailand, <i>Timor-Leste</i> , Viet Nam                                                                                                                                                                                      |
| Australasia (26/26)                    | Australia, New Zealand                                                                                                                                                                                                                                                                                                                           |
| Caribbean (38/40)                      | Antigua and Barbuda, <i>Aruba</i> , Bahamas, Belize, Barbados, Cuba, Dominica, Dominican Republic, Grenada, <i>Guadeloupe</i> , Guyana, Haiti, Jamaica, <i>Martinique</i> , <i>Netherlands Antilles</i> , Saint Kitts and Nevis, Saint Lucia, Suriname, Trinidad and Tobago, Saint Vincent and the Grenadines                                    |
| Europe Central (108/108)               | Albania, Bulgaria, Bosnia and Herzegovina, Czech Republic, Croatia, Hungary, The former Yugoslav Republic of Macedonia, Montenegro, Poland, Romania, Serbia, Slovakia, Slovenia                                                                                                                                                                  |
| Europe Eastern (206/206)               | Belarus, Estonia, Lithuania, Latvia, Republic of Moldova, Russian Federation, Ukraine                                                                                                                                                                                                                                                            |
| Europe Western (414/414)               | Andorra, Austria, Belgium, Switzerland, Cyprus, Germany, Denmark, Spain, Finland, France, United Kingdom, Greece, Ireland, Iceland, Israel, Italy, Luxembourg, <i>Monaco</i> , Malta, Netherlands, Norway, Portugal, San Marino, Sweden                                                                                                          |
| Latin America Andean (53/53)           | Bolivia, Ecuador, Peru                                                                                                                                                                                                                                                                                                                           |
| Latin America Central (230/230)        | Colombia, Costa Rica, Guatemala, Honduras, Mexico, Nicaragua, Panama, El Salvador, Venezuela                                                                                                                                                                                                                                                     |
| Latin America Southern (61/61)         | Argentina, Chile, Uruguay                                                                                                                                                                                                                                                                                                                        |
| Latin America Tropical (205/205)       | Brazil, Paraguay                                                                                                                                                                                                                                                                                                                                 |
| North Africa Middle East (473/478)     | United Arab Emirates, Bahrain, Algeria, Egypt, Iran, Iraq, Jordan, Kuwait, Lebanon, Libyan Arab Jamahiriya, Morocco, Oman, Qatar, <i>Palestinian Territories</i> , Saudi Arabia, Syrian Arab Republic, Tunisia, Turkey, Yemen                                                                                                                    |
| North America High Income (348/348)    | Canada, United States of America                                                                                                                                                                                                                                                                                                                 |
| Oceania (0/9)                          | <i>American Samoa</i> , <i>Cook Islands</i> , <i>Fiji</i> , <i>Micronesia</i> , <i>Guam</i> , <i>Kiribati</i> , <i>Marshall Islands</i> , <i>Micronesia</i> , <i>Niue</i> , <i>Nauru</i> , <i>New Caledonia</i> , <i>Palau</i> , <i>Papua New Guinea</i> , <i>Solomon Islands</i> , <i>Tonga</i> , <i>Tuvalu</i> , <i>Vanuatu</i> , <i>Samoa</i> |
| Sub-Saharan Africa Central (98/98)     | Angola, Central African Republic, Democratic Republic of the Congo, Congo, Gabon, Equatorial Guinea                                                                                                                                                                                                                                              |
| Sub-Saharan Africa East (357/357)      | Burundi, Comoros, Djibouti, Eritrea, Ethiopia, Kenya, Madagascar, Mozambique, Mauritius, Malawi, Rwanda, Sudan, Somalia, Seychelles, United Republic of Tanzania, Uganda, Zambia                                                                                                                                                                 |
| Sub-Saharan Africa Southern (70/70)    | Botswana, Lesotho, Namibia, Swaziland, South Africa, Zimbabwe                                                                                                                                                                                                                                                                                    |
| Sub-Saharan Africa West (339/339)      | Benin, Burkina Faso, Côte d'Ivoire, Cameroon, Cape Verde, Ghana, Guinea, Gambia, Guinea-Bissau, Liberia, Mali, Mauritania, Niger, Nigeria, Senegal, Sierra Leone, Sao Tome and Principe, Chad, Togo                                                                                                                                              |

**Table S2.** Regional Groupings Used in TM5-FASST.

| <b>Region</b> | <b>Countries in region</b>                                                                                                                                                                                                                                                                                                                                                                                                                                 |
|---------------|------------------------------------------------------------------------------------------------------------------------------------------------------------------------------------------------------------------------------------------------------------------------------------------------------------------------------------------------------------------------------------------------------------------------------------------------------------|
| ARG           | Argentina, Falkland Islands, Uruguay                                                                                                                                                                                                                                                                                                                                                                                                                       |
| AUT           | Austria, Liechtenstein, Slovenia                                                                                                                                                                                                                                                                                                                                                                                                                           |
| BLX           | Belgium, Luxembourg, Netherlands                                                                                                                                                                                                                                                                                                                                                                                                                           |
| CAN           | Canada, Greenland                                                                                                                                                                                                                                                                                                                                                                                                                                          |
| CHN           | China, Hong Kong, Macau                                                                                                                                                                                                                                                                                                                                                                                                                                    |
| EAF           | Burundi, Central African Republic, Chad, Comoros, DR Congo, Djibouti, Eritrea, Ethiopia, Kenya, Madagascar, Mauritius, Reunion, Rwanda, Seychelles, Somalia, Sudan, Tanzania, Uganda                                                                                                                                                                                                                                                                       |
| ESP           | Gibraltar, Portugal, Spain                                                                                                                                                                                                                                                                                                                                                                                                                                 |
| FRA           | France, Andorra                                                                                                                                                                                                                                                                                                                                                                                                                                            |
| GBR           | Ireland, United Kingdom                                                                                                                                                                                                                                                                                                                                                                                                                                    |
| GOLF          | Bahrain, Iran, Iraq, Kuwait, Oman, Qatar, Saudi Arabia, United Arab Emirates, Yemen                                                                                                                                                                                                                                                                                                                                                                        |
| GRC           | Cyprus, Greece                                                                                                                                                                                                                                                                                                                                                                                                                                             |
| IDN           | Indonesia, Timor-Leste                                                                                                                                                                                                                                                                                                                                                                                                                                     |
| ITA           | Italy, Malta, Monaco, San Marino, Vatican City State                                                                                                                                                                                                                                                                                                                                                                                                       |
| MEME          | Israel, Jordan, Lebanon, Palestinian Territory, Syrian Arab Republic                                                                                                                                                                                                                                                                                                                                                                                       |
| MON           | North Korea, Mongolia                                                                                                                                                                                                                                                                                                                                                                                                                                      |
| MYS           | Brunei Darussalam, Malaysia, Singapore                                                                                                                                                                                                                                                                                                                                                                                                                     |
| NDE           | India, Maldives, Sri Lanka                                                                                                                                                                                                                                                                                                                                                                                                                                 |
| NOA           | Algeria, Libya, Morocco, Tunisia, Western Sahara                                                                                                                                                                                                                                                                                                                                                                                                           |
| NOR           | Iceland, Norway, Svalbard and Jan Mayen Islands                                                                                                                                                                                                                                                                                                                                                                                                            |
| PAC           | Fiji, French Polynesia, Guam, Kiribati, Marshall Islands, Micronesia, Nauru, New Caledonia, Niue, Norfolk Island, Northern Mariana Islands, Palau, Papua New Guinea, Pitcairn, Samoa, Solomon Islands, Tokelau, Tonga, Tuvalu, Vanuatu, Wallis and Futuna Islands                                                                                                                                                                                          |
| POL           | Estonia, Latvia, Lithuania, Poland                                                                                                                                                                                                                                                                                                                                                                                                                         |
| RCAM          | Anguilla, Antigua and Barbuda, Aruba, Bahamas, Barbados, Belize, Cayman Islands, Costa Rica, Cuba, Dominica, Dominican Republic, El Salvador, Grenada, Guadeloupe, Guatemala, Haiti, Honduras, Jamaica, Martinique, Montserrat, Netherlands Antilles, Nicaragua, Panama, Puerto Rico, Saint Kitts and Nevis, Saint Lucia, Saint Vincent and the Grenadines, Trinidad and Tobago, Turks and Caicos Islands, Virgin Islands (British), Virgin Islands (U.S.) |
| RCEU          | Albania, Bosnia and Herzegovina, Croatia, Macedonia, Serbia and Montenegro                                                                                                                                                                                                                                                                                                                                                                                 |
| RCZ           | Czech Republic, Slovakia                                                                                                                                                                                                                                                                                                                                                                                                                                   |
| RIS           | Kyrgyzstan, Tajikistan, Turkmenistan, Uzbekistan                                                                                                                                                                                                                                                                                                                                                                                                           |
| RSA           | Lesotho, South Africa, Swaziland                                                                                                                                                                                                                                                                                                                                                                                                                           |
| RSAM          | Bolivia, Colombia, Ecuador, French Guiana, Guyana, Paraguay, Peru, Suriname, Venezuela                                                                                                                                                                                                                                                                                                                                                                     |
| RSAS          | Afghanistan, Bangladesh, Bhutan, Nepal, Pakistan                                                                                                                                                                                                                                                                                                                                                                                                           |
| RSEA          | Cambodia, Laos, Myanmar                                                                                                                                                                                                                                                                                                                                                                                                                                    |
| RUS           | Armenia, Azerbaijan, Georgia, Russian Federation                                                                                                                                                                                                                                                                                                                                                                                                           |
| SAF           | Angola, Botswana, Malawi, Mayotte, Mozambique, Namibia, Zambia, Zimbabwe                                                                                                                                                                                                                                                                                                                                                                                   |
| SWE           | Denmark, Faroe Islands, Sweden                                                                                                                                                                                                                                                                                                                                                                                                                             |
| UKR           | Belarus, Moldova, Ukraine                                                                                                                                                                                                                                                                                                                                                                                                                                  |
| USA           | Bermuda, Saint Pierre and Miquelon, United States                                                                                                                                                                                                                                                                                                                                                                                                          |
| WAF           | Benin, Burkina Faso, Cameroon, Cape Verde, Congo, Cote D'Ivoire, Equatorial Guinea, Gabon, Gambia, Ghana, Guinea, Guinea-Bissau, Liberia, Mali, Mauritania, Niger, Nigeria, Saint Helena, Sao Tome and Principe, Senegal, Sierra Leone, Togo                                                                                                                                                                                                               |

**Table S3.** Regional Groupings Used in GAINS.

| <b>Region</b>       | <b>Countries in region</b>                                                                                                                                                                                                                                                                                                                                                                                                                                                                                                    |
|---------------------|-------------------------------------------------------------------------------------------------------------------------------------------------------------------------------------------------------------------------------------------------------------------------------------------------------------------------------------------------------------------------------------------------------------------------------------------------------------------------------------------------------------------------------|
| Former USSR (Asia)  | Tajikistan, Turkmenistan, Uzbekistan                                                                                                                                                                                                                                                                                                                                                                                                                                                                                          |
| Middle East         | Bahrain, Iran, Iraq, Jordan, Kuwait, Lebanon, Oman, Qatar, Saudi Arabia, Syrian Arab Republic, United Arab Emirates, Yemen                                                                                                                                                                                                                                                                                                                                                                                                    |
| North Africa        | Algeria, Libyan Arab Jamahiriya, Morocco, Sudan, Tunisia                                                                                                                                                                                                                                                                                                                                                                                                                                                                      |
| Other Africa        | Angola, Benin, Botswana, Burkina Faso, Burundi, Cameroon, Cape Verde, Central African Republic, Chad, Comoros, Democratic Republic of Congo, Congo, Cote d'Ivoire, Djibouti, Equatorial Guinea, Eritrea, Ethiopia, Gabon, Gambia, Ghana, Guinea, Guinea-Bissau, Kenya, Lesotho, Liberia, Madagascar, Malawi, Mali, Mauritania, Mauritius, Mozambique, Namibia, Niger, Nigeria, Rwanda, Sao Tome and Principe, Senegal, Seychelles, Sierra Leone, Somalia, Swaziland, Tanzania, Togo, Uganda, Western Sahara, Zambia, Zimbabwe |
| Other Latin America | Antigua and Barbuda, Bahamas, Barbados, Belize, Bolivia, Colombia, Costa Rica, Cuba, Dominica, Dominican Republic, Ecuador, El Salvador, French Guiana, Grenada, Guatemala, Guyana, Haiti, Honduras, Jamaica, Nicaragua, Panama, Paraguay, Peru, Puerto Rico, Saint Kitts and Nevis, Saint Lucia, Saint Vincent and the Grenadines, Suriname, Trinidad and Tobago, Uruguay, Venezuela                                                                                                                                         |

**Table S4.** Population and Emissions Data Used in the Analysis.

| Region                       | Population 1990 <sup>a</sup> | Population 2005 <sup>a</sup> | Population 2010 <sup>a</sup> | PPM <sub>2.5-cook</sub> 1990 <sup>b</sup> | PPM <sub>2.5-cook</sub> 2005 <sup>b</sup> | PPM <sub>2.5-cook</sub> 2010 <sup>b</sup> | PM <sub>2.5-hh</sub> 1990 <sup>c</sup> | PM <sub>2.5-hh</sub> 2005 <sup>c</sup> | PM <sub>2.5-hh</sub> 2010 <sup>c</sup> |
|------------------------------|------------------------------|------------------------------|------------------------------|-------------------------------------------|-------------------------------------------|-------------------------------------------|----------------------------------------|----------------------------------------|----------------------------------------|
| High-income Asia Pacific     | 170                          | 180                          | 181                          | 14%                                       | 5%                                        | 6%                                        | 12%                                    | 14%                                    | 12%                                    |
| Central Asia                 | 69                           | 77                           | 81                           | 3%                                        | 0%                                        | 1%                                        | 23%                                    | 36%                                    | 21%                                    |
| East Asia                    | 1175                         | 1344                         | 1383                         | 83%                                       | 85%                                       | 85%                                       | 34%                                    | 24%                                    | 18%                                    |
| Southeast Asia               | 455                          | 572                          | 609                          | 90%                                       | 89%                                       | 89%                                       | 28%                                    | 21%                                    | 18%                                    |
| South Asia                   | 1106                         | 1473                         | 1591                         | 82%                                       | 83%                                       | 82%                                       | 21%                                    | 36%                                    | 32%                                    |
| Australasia                  | 20                           | 24                           | 26                           | 4%                                        | 2%                                        | 2%                                        | 2%                                     | 5%                                     | 4%                                     |
| Caribbean                    | 31                           | 37                           | 38                           | 83%                                       | 83%                                       | 83%                                       | 12%                                    | 11%                                    | 14%                                    |
| Central Europe               | 112                          | 109                          | 108                          | 0%                                        | 0%                                        | 0%                                        | 19%                                    | 31%                                    | 23%                                    |
| Eastern Europe               | 223                          | 212                          | 206                          | 0%                                        | 0%                                        | 0%                                        | 19%                                    | 32%                                    | 19%                                    |
| Western Europe               | 381                          | 407                          | 414                          | 0%                                        | 0%                                        | 0%                                        | 10%                                    | 16%                                    | 14%                                    |
| Andean Latin America         | 39                           | 50                           | 53                           | 83%                                       | 83%                                       | 83%                                       | 7%                                     | 10%                                    | 11%                                    |
| Central Latin America        | 167                          | 215                          | 230                          | 83%                                       | 83%                                       | 83%                                       | 8%                                     | 7%                                     | 9%                                     |
| Southern Latin America       | 49                           | 58                           | 61                           | 82%                                       | 81%                                       | 81%                                       | 13%                                    | 16%                                    | 18%                                    |
| Tropical Latin America       | 154                          | 193                          | 205                          | 83%                                       | 83%                                       | 83%                                       | 5%                                     | 8%                                     | 9%                                     |
| High-income North America    | 284                          | 332                          | 348                          | 0%                                        | 0%                                        | 0%                                        | 4%                                     | 10%                                    | 10%                                    |
| North Africa and Middle East | 318                          | 432                          | 473                          | 34%                                       | 31%                                       | 31%                                       | 15%                                    | 15%                                    | 14%                                    |
| Central sub-Saharan Africa   | 55                           | 84                           | 98                           | 99%                                       | 99%                                       | 99%                                       | 6%                                     | 17%                                    | 19%                                    |
| Eastern sub-Saharan Africa   | 211                          | 314                          | 357                          | 97%                                       | 94%                                       | 94%                                       | 6%                                     | 16%                                    | 18%                                    |
| Southern sub-Saharan Africa  | 52                           | 68                           | 70                           | 95%                                       | 94%                                       | 93%                                       | 13%                                    | 34%                                    | 41%                                    |
| Western sub-Saharan Africa   | 199                          | 301                          | 339                          | 99%                                       | 99%                                       | 99%                                       | 10%                                    | 26%                                    | 30%                                    |
| <b>World</b>                 | <b>5269</b>                  | <b>6483</b>                  | <b>6872</b>                  | <b>62%</b>                                | <b>65%</b>                                | <b>65%</b>                                | <b>20%</b>                             | <b>23%</b>                             | <b>21%</b>                             |

<sup>a</sup>Population x 10<sup>6</sup>. <sup>b</sup>Percent of primary PM<sub>2.5</sub> household emissions attributable to household cooking (GAINS). <sup>c</sup>Percent of combustion-derived emissions attributable to household cooking and heating (TM5-FASST).



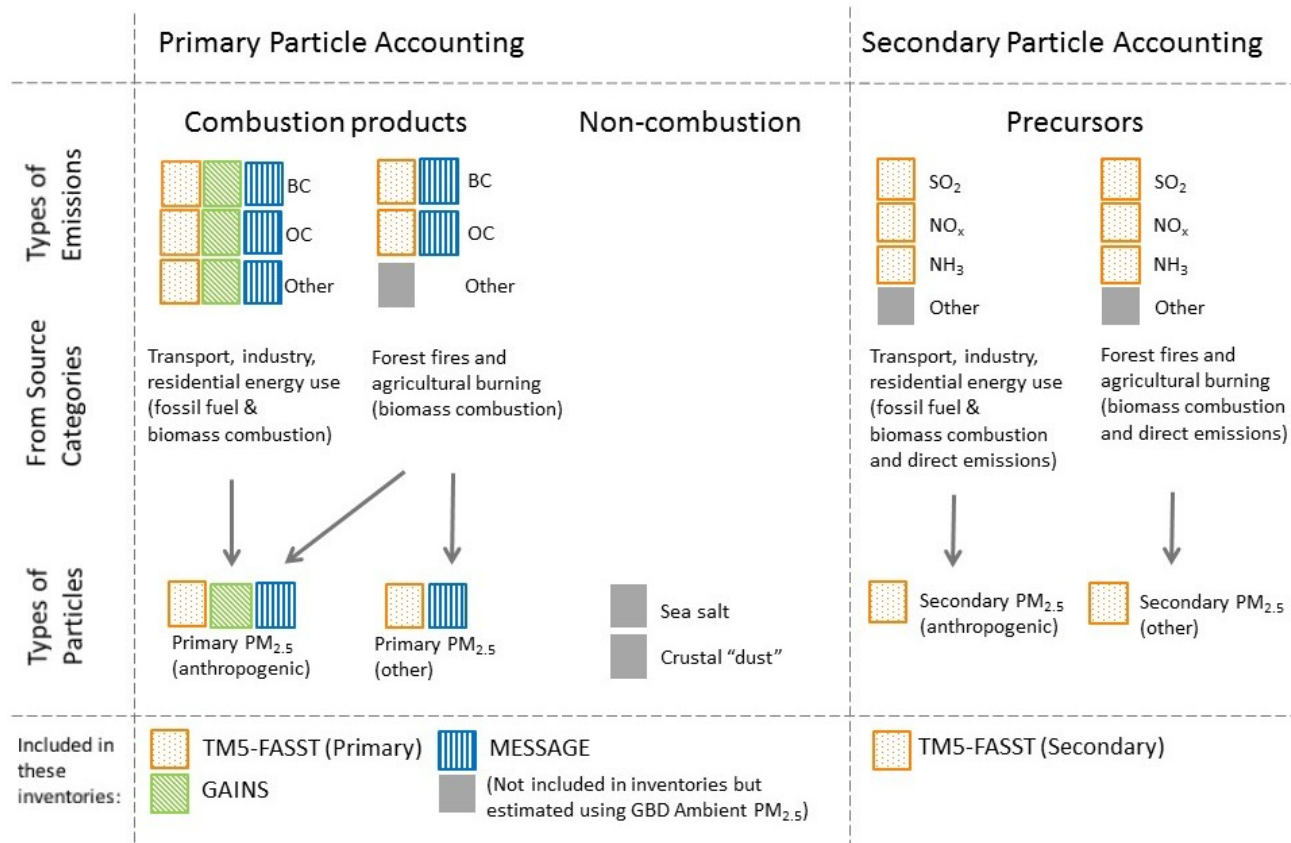

**Figure S1.** Emissions and particle coverage in the major databases and models used in this analysis. Note that sea salt, dust, and some secondary particle precursors are not included in the models used here; however, they are represented in the total ambient PM<sub>2.5</sub> concentrations calculate for GBD 2010, published in Brauer et al. (2012) and used in the final stages of the analysis presented in this analysis.
